# Supplementary material for: The Iceland-Faroe warm-water flow towards the Arctic estimated from satellite altimetry and in situ observations
Source: Copernicus journal article supplement (doi:10.5194/egusphere-2023-828), 2023-04-27
Supplement: Supplementary file [file egusphere-2023-828-AC1-supplement.pdf]

## Referee 1

We thank the referee for a very constructive and helpful review. Below, we detail how each referee comment has been addressed and how the manuscript has been modified accordingly.

### Manuscript structure

As suggested by both referees, we have tried to re-structure the manuscript to enable better flow. Five tables have been moved to a new Appendix B and Figure 12 has been moved to the Materials and methods section together with associated text. In addition, the Introduction (Sect. 1) has been organized into four sub-sections, mainly to put more emphasis on the definition of Atlantic water for transport calculation.

In the following, we address specific comments from Referee 1 where quoted text from the old or the new version of the manuscript is in *italic*.

### Organization:

**Referee:** The results sections 5 and 6 (having multiple sub-sections) would benefit from a brief introductory paragraph for each of those sections (before 5.1 and 6.1).

**Reply:** Has been done

**Referee:** The results sections include a lot of detail on methods used (for example section 6.1 which refers back to section 3 and Table 3 a few times; section 6.2 following on from 6.1; parts of section 6.3 (for example Fig 12)). Would the paper flow better if some sections got moved into the Methods section? Maybe that will disturb the flow of the paper but maybe the authors could consider this.

**Reply:** Fig. 12 and associated text has been moved to Sect. 2.1. Together with five tables being moved to the new Appendix B, this should help streamlining the manuscript. Unfortunately, we have not been able to identify any additional re-structuring that could get a better flow.

**Referee:** Tables: a total of 14 tables are in the main part of the manuscript, as mentioned above, could these get critically evaluated to see if some could get moved to the methods section and/or an appendix (Tables 3, 4 include a lot of detail that it already suitably summarized in the text and could be included in an Appendix for example).

**Reply:** A new appendix was added: "Appendix B: Supplementary tables" and 5 tables moved from the main text to this appendix: Table 1, Table 3, Table 5, Table 10, and Table 14. The associated text was modified to de-emphasize these tables.

**Referee:** Finish the paper with one strong paragraph summarizing the main results in a final Conclusions section (7.7).

**Reply:** Has been done. The heading of Sect. 7 has been modified accordingly.

## Clarifications:

**Referee:** Lines 145-146: What is the seasonal spread of the CTD cruises? Have you applied standard QC to the CTD data, if so, mention it.

**Reply:** The text: “*mainly in February, May, August–September, or November*” has been added. Also, the following sentence was added: “*Initially, an EG&G CTD was used but since 1996, this was replaced by a SeaBird 911+. Water samples were acquired for salinity calibration and all the data have been quality controlled.*”

**Referee:** Lines 169-174: What type of ADCP was used?

**Reply:** The following sentence has been added: “*Three different ADCP models from Teledyne RD Instruments have been used: 150 kHz Broadband, 75 kHz Broadband, and Long Ranger.*”

**Referee:** Line: 175: “either 10 m or 25 m” state what this depends on.

**Reply:** We have added the text: “*depending on bottom depth and ADCP model*”

**Referee:** Line 207: “necessary additional information” – be specific what this is.

**Reply:** The paragraph has been reorganized and it has been specified that it is the lack of regular CTD data that prevent a more reliable extrapolation to the surface.

**Referee:** Lines 362-363: the average surface velocity is likely underestimated by the extrapolation method – could you give an indication or estimate of how much this would be?

**Reply:** We do not have any evidence, on which to base an objective estimate and would prefer not to guess. Instead, we now write: “*the shape of the profile indicates that the average surface velocity is likely to be underestimated by the extrapolation method, although it is difficult to estimate by how much.*”

**Referee:** Lines 683-684: Here you use more decimals than in the rest of the paper, be consistent, 11 cm s<sup>-1</sup> and 12 cm s<sup>-1</sup>.

**Reply:** We used the extra decimal to indicate that the difference between the two numbers was small, but the sentence has been changed so that it now reads: “*For the whole interval between A<sub>3</sub> and A<sub>8</sub>, the average offset based on the new MDT is only 4 % smaller than the ADCP-based value.*”

**Referee:** Sections 7.2 and 7.4 need highlights in bold italic.

**Reply:** Section 7.2 now has three highlighted sentences and Section 7.4 has two.

## Figures:

**Referee:** It would be useful if the lat/lon range in the figures were consistent (except for 1a which requires a larger area for context) for ease of comparison (especially for Figs 5a and 5b).

**Reply:** Old Fig. 5a (new Fig. 6a), Fig. 5b (new Fig. 6b), Fig.14, and Fig. 16 now have the same map boundaries and the same basic map.

**Referee:** Please make the colour bars distinct for ease of interpretation (Figs 4, 10).

**Reply:** The colour bars of old Fig. 4 (new Fig. 5) and Fig. 10 (new Fig. 11) have been made distinct by introducing lines at the same intervals as the contour lines.

**Referee:** Are the figures compatible with colour-vision deficiencies? (using not just colours but dashed/dotted lines for example).

**Reply:** Old Fig. 6 (new Fig. 7) and Fig. 9b (new Fig. 10b) have been modified by making some of the lines dashed.

**Referee:** Fig 3a: could this figure get rotated to have depth on the y-axis to match Fig 3b or is there a specific reason for this orientation?

**Reply:** Old Fig 3a (new Fig. 4a) has been rotated so that the depth axis is vertical as in Fig 3b.

**Referee:** Fig 6: Mark (by a horizontal line?) where the extrapolation starts on each of the four profiles.

**Reply:** The extrapolation start is now marked by a black circle on each profile on the new Fig. 7a.

**Referee:** Fig 7: make the four sub-plots consistent with regard to x-lim, number of bars for ease of comparison.

**Reply:** A new consistent figure (new Fig. 8) has been made.

#### **Technical corrections:**

**Referee:** Line 35: Define Greenland-Scotland-Ridge acronym (GSR) at first use and then use acronym throughout.

**Reply:** The Greenland-Scotland-Ridge is only referred to twice in addition to this, and towards the end of the manuscript. We have therefore instead replaced the one reference to “GSR” by the full name: “Greenland-Scotland Ridge”.

**Referee:** Line 41: include abbreviation “IFF” here.

**Reply:** Has been done.

**Referee:** Line 43-44: check the grammar of that sentence.

**Reply:** The sentence has been split into two sentences and clarified.

**Referee:** Line 143: “Materials and Methods”

**Reply:** Has been corrected.

**Referee:** Line 146: “many CTD profiles” – be specific: “between 98 and 155 CTD profiles”

**Reply:** Has been specified.

**Referee:** Line 229: only use “MDT” (acronym already defined earlier)

**Reply:** Has been done.

**Referee:** Fig 2a: The label for A2 is hidden behind N01, reposition it so it is visible; label for A4 is missing in the figure

**Reply:** The figure has been modified to correct this.

**Referee:** Fig 5b: the blue track is hard to see, choose a different/more distinct colour/line style/width.

**Reply:** The track has been made thicker and the background has also been changed, which should enhance the contrast (new Fig. 6b).

**Referee:** Line 643: change to “Comparison of in situ observations with old and new altimetry data”

**Reply:** Has been changed

**Referee:** Line 725: “some”

**Reply:** Has been corrected.
